# Supplementary material
Source: PubMed Central journal article supplement (PMC6597291)
Supplement: NIHMS1011618-supplement-Supp_FigS1.pdf [file NIHMS1011618-supplement-Supp_FigS1.pdf]

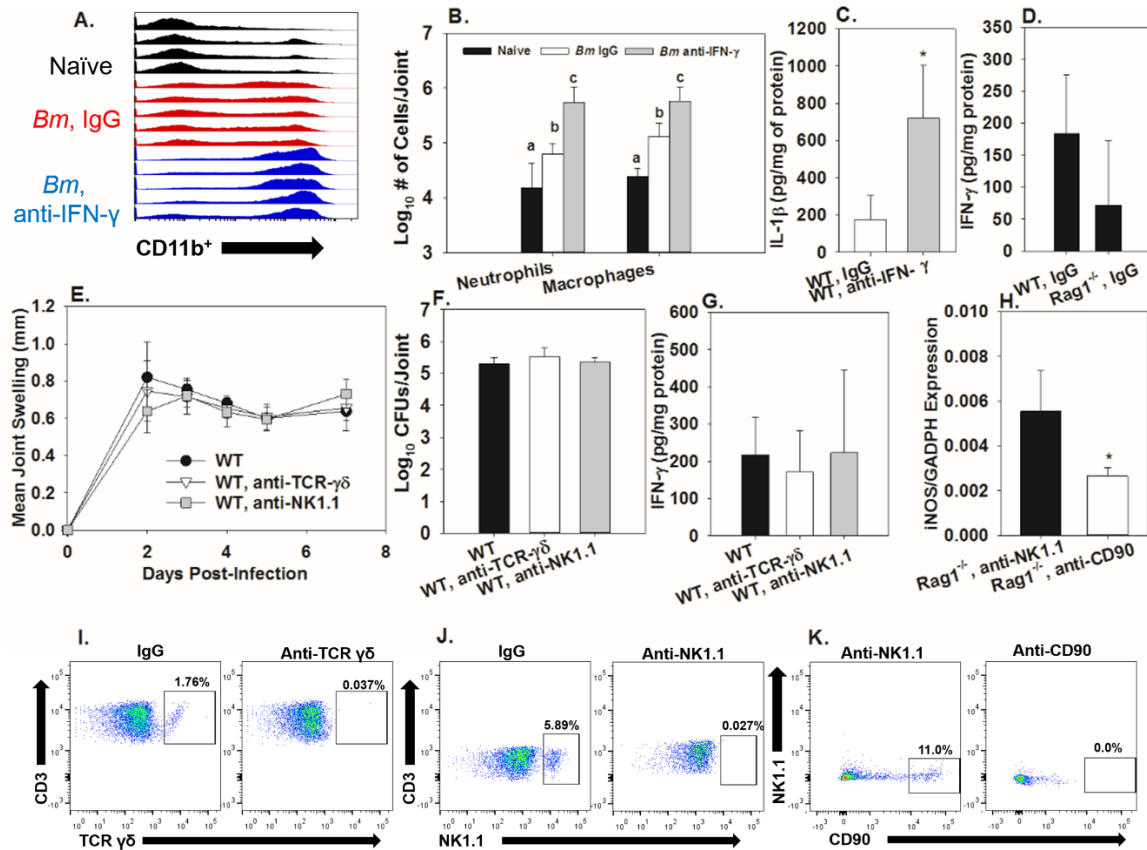

**Figure S1**

**A-C),** WT mice were treated with IgG or neutralizing anti-IFN- $\gamma$  antibody and footpad infected with  $1 \times 10^5$  *B. melitensis* 16M. Mice were euthanized at 7 days post-infection. Flow cytometry was conducted on joints from infected mice and on naïve animals as a control. Depicted are histograms of CD11b<sup>+</sup> cells from individual mice **A)**, and bar graphs indicating the mean number of neutrophils (CD45.2<sup>+</sup>/CD11b<sup>+</sup>/Ly-6G<sup>+</sup>) or macrophages CD45.2<sup>+</sup>/CD11b<sup>+</sup>/F4/80<sup>+</sup>) in each group (n=4-5) **B)**. Means with the same letter are not statistically different from each other as determined by ANOVA followed by Tukey's test. **C)** IL-1 $\beta$  levels were measured in joint homogenates from wild-type mice (n=4/group) treated with IgG or anti-IFN- $\gamma$  7 days after footpad infection. \*P<0.05 as compared to IgG treated mice. **D)** IFN- $\gamma$  levels were measured in joint homogenates from IgG-treated WT or Rag1<sup>-/-</sup> mice (n=4/group) 7 days after footpad infection.

**E-G, I,J),** WT mice (n=4/5group) were treated with vehicle or 0.5 mg of anti-TCR $\gamma\delta$  (clone UC7-13D5), or anti-NK1.1 (clone PK136) on days -1 and 3 in relation to footpad infection with  $1 \times 10^5$  *B. melitensis*. Joint swelling was assayed **E)**. At 7 days post-infection, joint CFUs and IFN- $\gamma$  levels were determined **F-G)**, and flow cytometry was performed to confirm depletion of  $\gamma\delta$  T cell and NK cells **I-J)**.  $\gamma\delta$  T cell depletion was confirmed by assaying TCR $\gamma\delta$  expression after gating on splenic T cells (CD45.2<sup>+</sup>/CD3<sup>+</sup>), representative plots are shown in **I)**. NK cell depletion was confirmed by assaying NK1.1 expression after gating on CD45.2<sup>+</sup>/CD3<sup>-</sup> cells within infected mouse joints, representative plots are shown in **J)**. (Confirmation of  $\gamma\delta$  T cell depletion was determined via flow cytometry on spleens as  $\gamma\delta$  T cells were not detected in IgG-treated joints).

**H,K),** Rag1<sup>-/-</sup> mice (n=5/group) were treated with anti-NK1.1 or anti-CD90. On day 7 post-infection RNA was extracted from joints and *iNOS* mRNA expression relative to *GAPDH* was determined **H)** and flow cytometry was performed to confirm depletion of NK cells and innate lymphoid cells **K)**. Expression of NK1.1 and CD90 was assayed after cells were gated as CD45<sup>+</sup>/Ly6G<sup>+</sup>/F4/80<sup>+</sup>/CD11b<sup>-</sup>. Representative plots are shown in **K)**. \*P<0.05 as compared to Rag1<sup>-/-</sup> mice treated with anti-NK1.1 in **H)**. All error bars depict SD.
